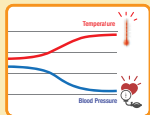

## Perioperative Infection Control – We Have A Role!

# Mitigation of Perioperative COVID-19 Infection

Uday Jain, BSEE, MD, PhD, FASA

Lalitha Sundararaman, MBBS, MD

**T**he current Omicron BA.2 surge has increased the likelihood that infected patients will undergo surgery. A study from March through August 2020 found that the 30-day risk of pulmonary complications, sepsis, and ischemic stroke was increased among patients positive for COVID-19 preoperatively (*Am J Surg* 2021;222:431-7). Higher risk for pulmonary complications and sepsis persisted at least one month after the positive test (*Am J Surg* 2021;222:431-7).

### Increased risk for health care providers

Patients with COVID-19 pose a risk to health care providers. A 2020 study in *The Lancet* compared the incidence of COVID-19 in the general population (2 million) and front-line providers (100,000) (*Lancet Public Health* 2020;5:E475-83). The incidence in health care providers was twice that of the general population. A multicenter international study early in the pandemic (March-June 2020) looked at the incidence of COVID-19 in health care providers who performed intubation (*Anaesthesia* 2020;75:1437-47). The authors gathered data from 1,718 health care providers in 17 countries (U.K., Europe, U.S.) who self-reported 5,148 tracheal intubations. Over the subsequent three weeks, 8.5% of the providers developed COVID-19.

### Non-pharmaceutical interventions

Non-pharmaceutical interventions are the first step to mitigate transmission risk. A meta-analysis showed that increasing the distance between individuals to greater than one meter reduced the risk of transmission from 12.8% to 2.6% (*Lancet* 2020;395:1973-87). Each additional meter of distance roughly doubled the benefit.

Face masks substantially reduce the risk of transmission. A paper in *Science* documented a 10% decrease in both symptomatic COVID-19 and seropositivity from a community masking study involving 600 villages in Bangladesh (*Science* 2022;375:eabi9069). Tight-fitting masks reduce leakage from the

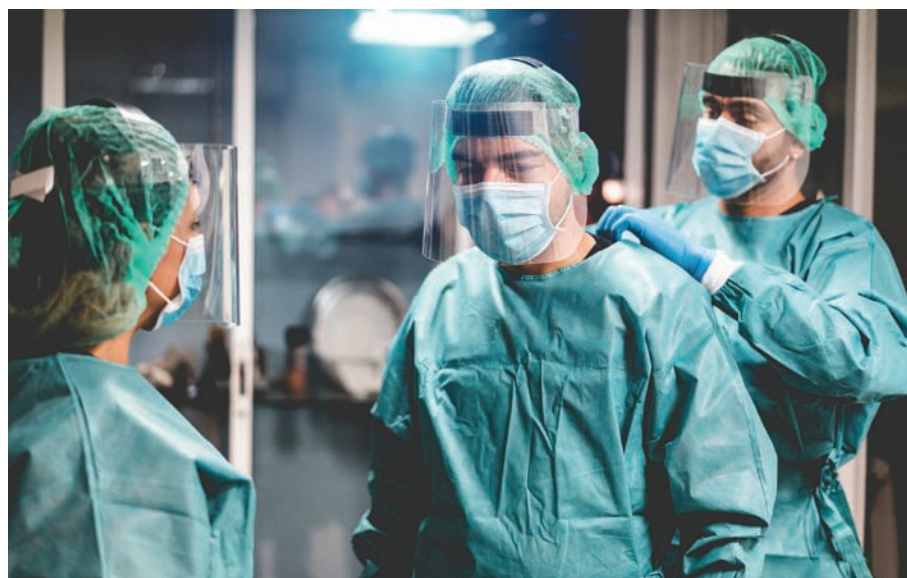

side and are critical to maximizing the fitted filtration efficiency (*JAMA Intern Med* 2020;180:1607-12). N95 particulate-filtering facepiece respirators filter 95% of 0.3  $\mu\text{m}$  particles, substantially better protection from aerosols than a standard surgical mask (*Nat Med* 2020;26:676-80). Face shields or goggles for eye protection also reduce the risk of transmission from 16% to 5.5% (*Lancet* 2020;395:1973-87). Prescription eyeglasses are inadequate.

### Optimizing anesthesia procedures

Regional anesthesia in infected patients should be performed in the OR instead of a block room or holding area with less adequate ventilation.

Intravenous induction and cuffed endotracheal tubes minimize the risk of transmission from infected children (*Anesth Analg* 2020;131:61-73). Videolaryngoscopy is preferred to direct laryngoscopy to increase the operator's distance from the airway. Coughing should be avoided during extubation. Supplemental oxygen should be minimized and administered via a mask rather than a nasal cannula. Only essential personnel should be allowed in the OR (*Orthop Trauma* 2020;34:333-40).

### Transmission of SARS-CoV-2

Exhalation generates an aerosol comprising a moist, warm cloud of droplets with virions (*JAMA* 2020;323:1837-8). The cloud can propel the droplets up to 7-8 meters with vigorous exhalation. Aerosols are droplets smaller than

5  $\mu\text{m}$ . Aerosols remain airborne for many hours. SARS-CoV-2 was initially thought to spread primarily through droplets, like influenza. However, the primary mode of transmission is via aerosols (*Annu Rev Chem Biomol Eng* February 2022).

The reproduction number  $R_0$  of influenza is 1.2. The reproductive number of the ancestral (Wuhan) strain of SARS-CoV-2 was approximately 3 (*Medicine (Baltimore)* 2021;100:e25837). Thus, the average number of persons who would have contracted COVID-19 from one infected person with COVID-19 was about 3 in March 2020.  $R_0$  for the BA.2 Omicron variant may be as high as 12, similar to measles.\* This is a hypothetical estimate of transmission in a susceptible population. This population no longer exists, as nearly the entire global population has acquired some immunity through infection, vaccination, or both.

### Mitigation of transmission

The OR should have 15 or more air exchanges per hour. Every air exchange removes up to two-thirds of the airborne virus. ORs can supplement limited air change with ultraviolet-C germicidal irradiation. Despite initial concerns, the risk of transmission of SARS-CoV-2 by fomites is very low (*J Infect Dis* May 2022). Nevertheless, surfaces should be cleaned with a disinfectant between cases.

### Patient preparation

SARS-CoV-2 on the skin is readily inactivated by povidone-iodine (7.5%-10%)

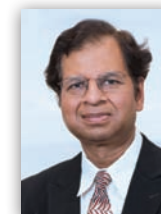

**Uday Jain, BSEE, MD, PhD, FASA**  
Staff Anesthesiologist, Anesthesia Care Consultants, San Francisco, California.

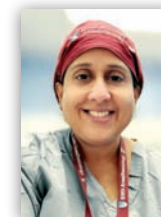

**Lalitha Sundararaman, MBBS, MD**  
Clinical Instructor, Department of Anesthesiology and Perioperative and Pain Medicine, Brigham and Women's Hospital, Harvard Medical School, Boston, Massachusetts.

or alcohol (isopropyl or ethyl 70%) with or without chlorhexidine (*Australas J Dermatol* 2021;62:37-40). Two doses of nasal povidone-iodine swabs within one hour before incision may be utilized to decolonize the nares (*JAMA Otolaryngol Head Neck Surg* 2020;146:787-8).

### PPE guidelines

Guidelines published in November 2021 recommend surgical mask and eye protection when caring for patients with suspected or diagnosed COVID-19 (*Clin Infect Dis* July 2020; *Crit Care Med* 2021;49:e219-34). For health care providers performing aerosol-generating procedures, the guidelines recommend an N95 or better respirator. A face shield or surgical mask may be used as a cover for the N95 respirator to permit extended use.

### Barrier enclosures

Several airway barrier enclosures made in part of transparent plastic sheets of varying stiffness, often on a frame for placement around the head and upper torso, have been described (*Anesth Analg* 2020;131:e135-6; *J Cardiothorac Vasc Anesth* 2021;35:966-7). Barriers may complicate and delay laryngoscopy and intubation while increasing the risk of transmission.

### Obstetrics

Infected but not severely ill mothers may stay in the same room as newborns while utilizing infection control precautions (*Curr Opin Pediatr* 2021;33:188-94). Breastfeeding has not been demonstrated to transmit infection. ■

\* See [twitter.com/DrIanWeissman/status/1529660702947950593](https://twitter.com/DrIanWeissman/status/1529660702947950593).
